# Supplementary material for: MircoRNA-33a inhibits epithelial-to-mesenchymal transition and metastasis and could be a prognostic marker in non-small cell lung cancer
Source: PubMed Central journal article supplement (PMC4556976; doi:10.1038/srep13677), 2015-09-02
Supplement: srep13677-s1.pdf [file srep13677-s1.pdf]

**MircoRNA-33a inhibits epithelial-to-mesenchymal transition and metastasis and could be a prognostic marker in non-small cell lung cancer**

Lihua Yang<sup>1,2,#</sup>, Jie Yang<sup>1,2,#</sup>, Jingqiu Li<sup>1,2</sup>, Xingkai Shen<sup>1,2</sup>, Yanping Le<sup>1,2</sup>, Chengwei Zhou<sup>3</sup>, Shaomin Wang<sup>4</sup>, Shun Zhang<sup>5</sup>, Dazhi Xu<sup>6,7</sup>, Zhaohui Gong<sup>1,2\*</sup>

**Supplementary Table 1.** Association of miR-33a levels and clinicopathological factors in 53 NSCLC patients

| Factors    |        | No. of cases | miR-33a level |             | <i>P</i> value |
|------------|--------|--------------|---------------|-------------|----------------|
|            |        |              | Hight (n / %) | Low (n / %) |                |
| Age        | ≤ 50 y | 22           | 13 / 59.09    | 9 / 40.91   | 0.43           |
|            | > 50 y | 31           | 17 / 54.83    | 14 / 45.17  |                |
| Gender     | Male   | 27           | 16 / 59.25    | 11 / 40.75  | 0.77           |
|            | Female | 26           | 14 / 53.85    | 12 / 46.15  |                |
| WHO grade  | I-II   | 28           | 11 / 39.29    | 17 / 60.71  | 0.002          |
|            | III-IV | 25           | 19 / 76.00    | 6 / 24.00   |                |
| Tumor size | ≤ 5 cm | 29           | 16 / 55.17    | 13 / 44.83  | 0.07           |
|            | > 5 cm | 24           | 14 / 58.33    | 10 / 41.67  |                |

**Supplementary Table 2.** Univariate and multivariate analyses for overall survival by Cox regression model

| Factors       | Univariate analysis |                | Multivariate analysis |                |
|---------------|---------------------|----------------|-----------------------|----------------|
|               | Hazard ration       | <i>P</i> value | Hazard ration         | <i>P</i> value |
| Age           | 1.21                | 0.41           | 1.18                  | 0.36           |
| Gender        | 0.91                | 0.72           | 0.94                  | 0.68           |
| WHO grade     | 3.12                | 0.002          | 2.97                  | 0.004          |
| Tumor size    | 2.32                | 0.08           | 2.39                  | 0.07           |
| miR-33a level | 2.13                | 0.01           | 2.35                  | 0.008          |

**Supplementary Table 3.** RNA oligonucleotide sequences

| RNA oligos        |           | Sequences (5' to 3')   |
|-------------------|-----------|------------------------|
| miR-33a mimics    | sense     | gugcauuguaguugcauugca  |
|                   | antisense | caaugcaacuacaauugcacuu |
| mimics NC         | sense     | uucuccgaacgugucacgutt  |
|                   | antisense | acgugacacguucggagaatt  |
| miR-33a inhibitor |           | ugcaaugcaacuacaauugcac |
| inhibitor NC      |           | caguacuuuuguguaguacaa  |
| Twist1 siRNA      | sense     | gguacaucgacuuccucuatt  |
|                   | antisense | uagaggaagucgauguacctt  |

**Supplementary Table 4.** Primer sequences for RT-PCR

| Gene             | Forward primer (5' to 3')        | Reverse primer (5' to 3')             |
|------------------|----------------------------------|---------------------------------------|
| CDH1             | gcattggcacatacactctctct          | tcggttaccgtgatcaaaatctc               |
| Vimentin         | aggaatggctcgtcaccttcgtgaata      | ggagtgtcggttgtaagaactagagct           |
| Twist1           | catgtccgcgtcccaactag             | tgtccattttctccttctctcg                |
| $\beta$ -actin   | cagaaggagattactgctctggct         | tactctgcttgctgatccacatc               |
| U6 snRNA         | ctcggttcggcagcaca                | aacgcttcacgaatttgcgt                  |
| miR-33a          | cctcataagcgggtgcattgta           | tatgctgttctcgtctctgtgtc               |
| Twist1 3'UTR     | ctagtctagacattctcaagaggtcgtgccaa | ctagtctagatagacaccggatctatttgcattttac |
| Twist1 3'UTR MUT | ctagtctagacattctcaagaggtcgtgccaa | ctagtctagatagacaccggatctattttaccatgg  |
| Twist1 gene      | gcgatccatgatgcaggacgt            | gcgaattcctagtgggacgcgga               |

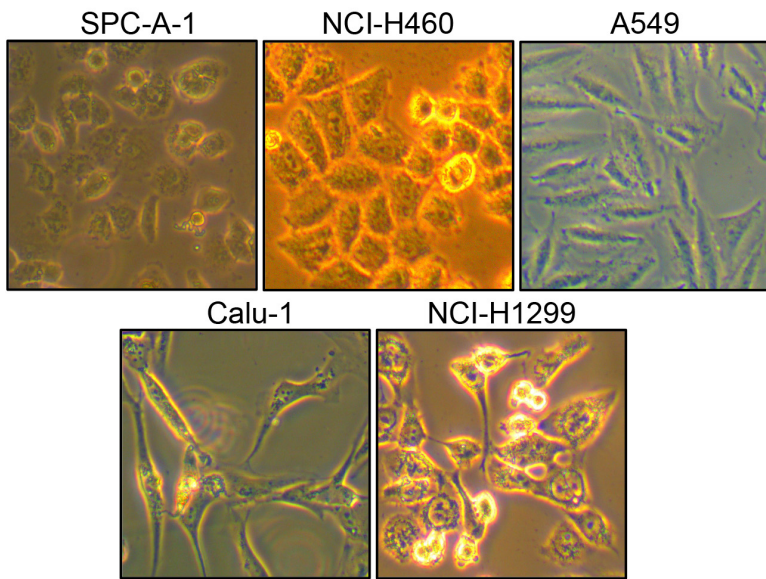

**Supplementary Figure 1.** The morphology of different NSCLC cells was observed under a phase contrast microscope (100 ×).

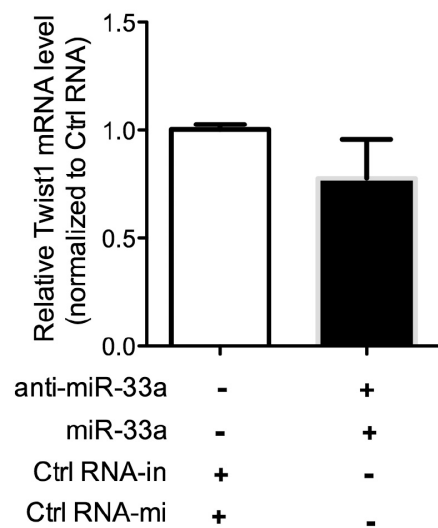

**Supplementary Figure 2.** Endogenous transcript level of Twist1 in response to miR-33a is rescued when miR-33a is cotransfected with the miR-33a inhibitor. Ctrl RNA-in, control RNA inhibitor; Ctrl RNA-mi, control RNA mimic.

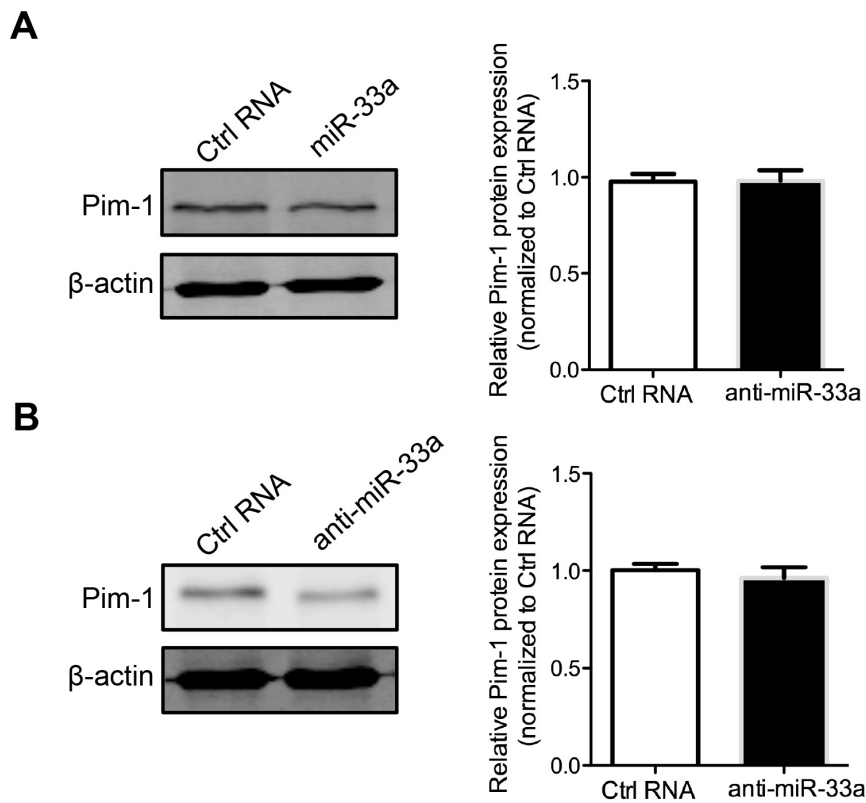

**Supplementary Figure 3.** miR-33a does not regulates Pim-1 expression in lung cancer cells. Western blotting and semi-quantitative analyses of Pim-1 (another target of miR-33a, *Oncogene* 2012, 31:918) protein expressions in NCI-H1299 and SPC-A-1 cells were performed after transfections of miR-33a (A) and anti-miR-33a (B), respectively.
